# Supplementary material for: Variation in changes in the incidence of colorectal cancer by age and association with screening uptake: an observational study
Source: PubMed Central journal article supplement — BMJ Open. 2020 Sep 22;10(9):e037925. doi: 10.1136/bmjopen-2020-037925 (PMC7509976; doi:10.1136/bmjopen-2020-037925), 2020-09-22
Supplement: bmjopen-2020-037925supp001.pdf [file bmjopen-2020-037925supp001.pdf]

**Supplementary Table 1: Age distribution of screening and post-screening population, by year, in six age groups (years)**

| Year | Age distribution of population, n (%), |         |         |         |         |         |         |         |         |         |         |        |
|------|----------------------------------------|---------|---------|---------|---------|---------|---------|---------|---------|---------|---------|--------|
|      | 50-54                                  |         | 55-59   |         | 60-64   |         | 65-69   |         | 70-74   |         | 75+     |        |
| 2001 | 54,240                                 | (26.4%) | 51,239  | (25.0%) | 44,137  | (21.5%) | 42,905  | (20.9%) | 12,679  | (6.2%)  | -       | (0.0%) |
| 2002 | 61,490                                 | (22.2%) | 74,204  | (26.8%) | 60,079  | (21.7%) | 57,307  | (20.7%) | 23,851  | (8.6%)  | -       | (0.0%) |
| 2003 | 65,241                                 | (21.5%) | 81,141  | (26.7%) | 63,410  | (20.9%) | 59,472  | (19.6%) | 34,581  | (11.4%) | -       | (0.0%) |
| 2004 | 67,571                                 | (20.5%) | 87,062  | (26.4%) | 68,088  | (20.6%) | 61,739  | (18.7%) | 45,561  | (13.8%) | -       | (0.0%) |
| 2005 | 62,874                                 | (18.2%) | 92,267  | (26.7%) | 70,813  | (20.5%) | 62,646  | (18.2%) | 52,651  | (15.3%) | 3,829   | (1.1%) |
| 2006 | 76,947                                 | (20.2%) | 93,881  | (24.6%) | 78,362  | (20.6%) | 64,371  | (16.9%) | 56,093  | (14.7%) | 11,204  | (2.9%) |
| 2007 | 82,678                                 | (19.7%) | 96,401  | (23.0%) | 88,775  | (21.2%) | 70,209  | (16.7%) | 59,571  | (14.2%) | 21,890  | (5.2%) |
| 2008 | 124,768                                | (20.9%) | 130,326 | (21.8%) | 120,431 | (20.1%) | 100,736 | (16.8%) | 81,370  | (13.6%) | 40,230  | (6.7%) |
| 2009 | 207,433                                | (21.4%) | 203,613 | (21.0%) | 192,470 | (19.8%) | 164,107 | (16.9%) | 132,759 | (13.7%) | 70,838  | (7.3%) |
| 2010 | 298,073                                | (21.6%) | 279,971 | (20.3%) | 279,627 | (20.2%) | 225,020 | (16.3%) | 189,222 | (13.7%) | 109,061 | (7.9%) |
| 2011 | 339,145                                | (21.0%) | 321,494 | (20.0%) | 317,497 | (19.7%) | 267,034 | (16.6%) | 218,456 | (13.6%) | 147,739 | (9.2%) |

|             |         |         |         |         |         |         |         |         |         |         |         |         |
|-------------|---------|---------|---------|---------|---------|---------|---------|---------|---------|---------|---------|---------|
| <b>2012</b> | 357,830 | (20.8%) | 339,212 | (19.8%) | 316,700 | (18.4%) | 293,561 | (17.1%) | 225,389 | (13.1%) | 184,587 | (10.7%) |
| <b>2013</b> | 376,959 | (20.7%) | 357,825 | (19.6%) | 323,931 | (17.8%) | 310,399 | (17.0%) | 233,617 | (12.8%) | 221,685 | (12.2%) |
| <b>2014</b> | 398,197 | (20.6%) | 375,480 | (19.5%) | 332,956 | (17.3%) | 323,005 | (16.7%) | 244,065 | (12.6%) | 256,410 | (13.3%) |
| <b>2015</b> | 411,856 | (20.3%) | 393,919 | (19.5%) | 342,353 | (16.9%) | 337,714 | (16.7%) | 249,651 | (12.3%) | 289,123 | (14.3%) |
| <b>2016</b> | 425,191 | (20.1%) | 408,845 | (19.3%) | 354,588 | (16.8%) | 338,041 | (16.0%) | 267,472 | (12.7%) | 320,149 | (15.1%) |
| <b>2017</b> | 422,301 | (19.3%) | 423,926 | (19.4%) | 367,652 | (16.8%) | 331,431 | (15.2%) | 290,065 | (13.3%) | 352,178 | (16.1%) |
