# Supplementary material for: Variation in changes in the incidence of colorectal cancer by age and association with screening uptake: an observational study
Source: PubMed Central journal article supplement — BMJ Open. 2020 Sep 22;10(9):e037925. doi: 10.1136/bmjopen-2020-037925 (PMC7509976; doi:10.1136/bmjopen-2020-037925), 2020-09-22
Supplement: bmjopen-2020-037925supp002.pdf [file bmjopen-2020-037925supp002.pdf]

**Supplementary Table 2: Age distribution of colorectal cancers, by year, in six age groups (years)**

**Age distribution of colorectal cancers detected in screening population, n (%)**

|             |     | <b>50-54</b> |     | <b>55-59</b> |     | <b>60-64</b> |     | <b>65-69</b> |     | <b>70-74</b> |     | <b>75+</b> |
|-------------|-----|--------------|-----|--------------|-----|--------------|-----|--------------|-----|--------------|-----|------------|
| <b>Year</b> |     |              |     |              |     |              |     |              |     |              |     |            |
| <b>2001</b> | 18  | (8.2%)       | 44  | (20.0%)      | 49  | (22.3%)      | 77  | (35.0%)      | 32  | (14.5%)      | -   | (0.0%)     |
| <b>2002</b> | 28  | (8.6%)       | 48  | (14.8%)      | 100 | (30.9%)      | 102 | (31.5%)      | 46  | (14.2%)      | -   | (0.0%)     |
| <b>2003</b> | 25  | (6.8%)       | 67  | (18.3%)      | 80  | (21.9%)      | 112 | (30.6%)      | 82  | (22.4%)      | -   | (0.0%)     |
| <b>2004</b> | 26  | (7.0%)       | 60  | (16.1%)      | 90  | (24.1%)      | 117 | (31.4%)      | 80  | (21.4%)      | -   | (0.0%)     |
| <b>2005</b> | 21  | (5.2%)       | 68  | (16.7%)      | 71  | (17.4%)      | 110 | (27.0%)      | 126 | (31.0%)      | 11  | (2.7%)     |
| <b>2006</b> | 21  | (5.1%)       | 50  | (12.0%)      | 82  | (19.8%)      | 117 | (28.2%)      | 116 | (28.0%)      | 29  | (7.0%)     |
| <b>2007</b> | 42  | (8.1%)       | 68  | (13.1%)      | 101 | (19.4%)      | 113 | (21.7%)      | 127 | (24.4%)      | 69  | (13.3%)    |
| <b>2008</b> | 56  | (6.8%)       | 84  | (10.2%)      | 152 | (18.5%)      | 184 | (22.4%)      | 222 | (27.1%)      | 122 | (14.9%)    |
| <b>2009</b> | 93  | (7.3%)       | 144 | (11.3%)      | 217 | (17.1%)      | 277 | (21.8%)      | 318 | (25.0%)      | 222 | (17.5%)    |
| <b>2010</b> | 132 | (6.6%)       | 212 | (10.6%)      | 351 | (17.6%)      | 423 | (21.2%)      | 505 | (25.3%)      | 372 | (18.6%)    |
| <b>2011</b> | 160 | (6.7%)       | 247 | (10.3%)      | 394 | (16.4%)      | 539 | (22.4%)      | 593 | (24.7%)      | 470 | (19.6%)    |
| <b>2012</b> | 158 | (6.5%)       | 243 | (10.0%)      | 391 | (16.1%)      | 530 | (21.8%)      | 579 | (23.9%)      | 525 | (21.6%)    |

|             |     |        |     |         |     |         |     |         |     |         |     |         |
|-------------|-----|--------|-----|---------|-----|---------|-----|---------|-----|---------|-----|---------|
| <b>2013</b> | 160 | (6.5%) | 266 | (10.8%) | 355 | (14.4%) | 531 | (21.6%) | 556 | (22.6%) | 594 | (24.1%) |
| <b>2014</b> | 152 | (6.0%) | 248 | (9.9%)  | 319 | (12.7%) | 532 | (21.1%) | 523 | (20.8%) | 743 | (29.5%) |
| <b>2015</b> | 172 | (6.6%) | 212 | (8.1%)  | 361 | (13.8%) | 468 | (17.9%) | 502 | (19.2%) | 899 | (34.4%) |
| <b>2016</b> | 183 | (6.6%) | 270 | (9.8%)  | 350 | (12.7%) | 490 | (17.8%) | 574 | (20.8%) | 887 | (32.2%) |
| <b>2017</b> | 165 | (5.7%) | 267 | (9.2%)  | 375 | (13.0%) | 492 | (17.0%) | 596 | (20.6%) | 993 | (34.4%) |
