# Supplementary figures and images for: Variation in changes in the incidence of colorectal cancer by age and association with screening uptake: an observational study
Source: PubMed Central journal article supplement — BMJ Open. 2020 Sep 22;10(9):e037925. doi: 10.1136/bmjopen-2020-037925 (PMC7509976; doi:10.1136/bmjopen-2020-037925), 2020-09-22

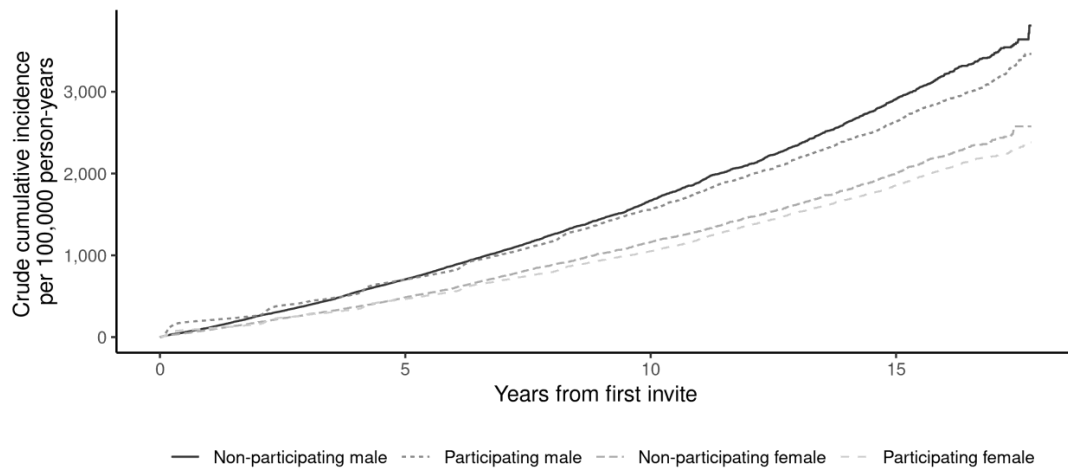

Supplement: bmjopen-2020-037925supp003.pdf [file bmjopen-2020-037925supp003.pdf]

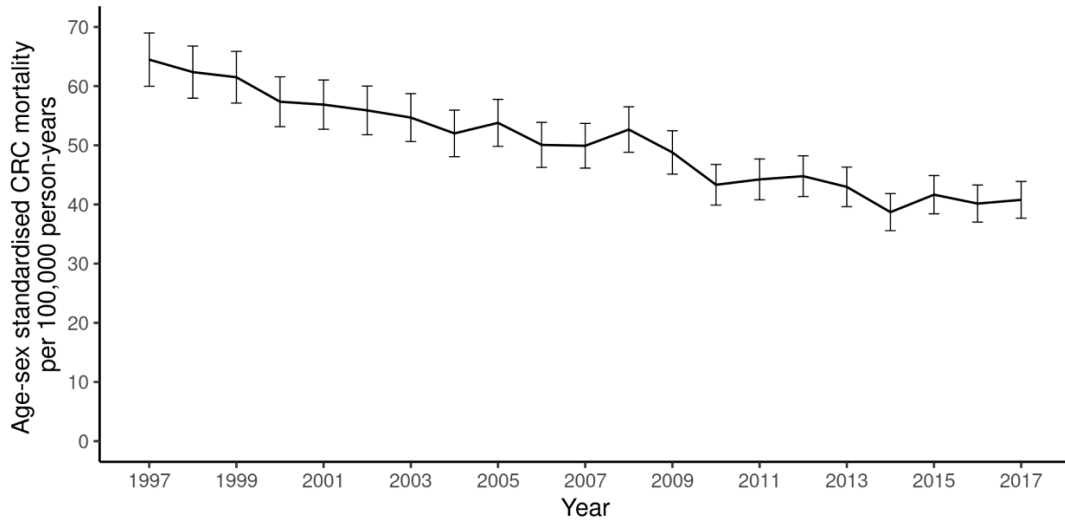

Supplement: bmjopen-2020-037925supp004.pdf [file bmjopen-2020-037925supp004.pdf]

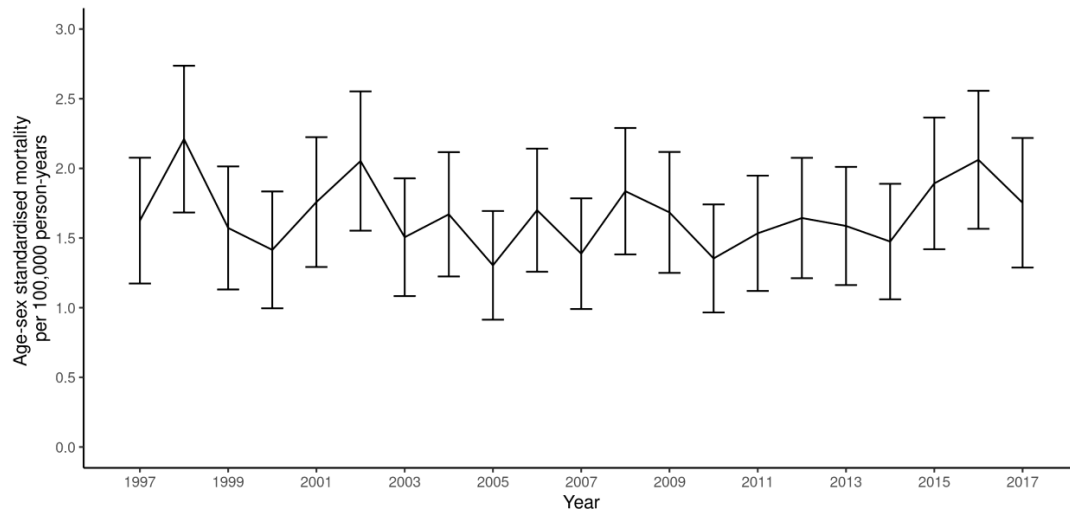

Supplement: bmjopen-2020-037925supp005.pdf [file bmjopen-2020-037925supp005.pdf]
